# Supplementary material for: A disparate role of RP11-424C20.2/UHRF1 axis through control of tumor immune escape in liver hepatocellular carcinoma and thymoma
Source: PubMed Central journal article supplement (PMC6738438; doi:10.18632/aging.102197), 2019-08-23
Supplement: aging-11-102197-s001.pdf [file aging-11-102197-s001.pdf]

## SUPPLEMENTARY TABLES

**Supplementary Table 1. Correlation analysis between UHRF1 and biomarkers of monocyte, dendritic cell, Th1 and T cell exhaustion in LIHC and THYM in GEPIA.**

| Description       | Gene markers         | LIHC |         | THYM  |         |
|-------------------|----------------------|------|---------|-------|---------|
|                   |                      | cor  | P       | cor   | P       |
| Monocyte          | CD86                 | 0.4  | 8.9e-16 | -0.36 | 5.2e-05 |
|                   | CD115 (CSF1R)        | 0.32 | 3.3e-10 | -0.3  | 0.001   |
| Dendritic cell    | HLA-DPB1             | 0.32 | 5.5e-10 | -0.32 | 0.00051 |
|                   | HLA-DQB1             | 0.18 | 0.00056 | -0.16 | 0.092   |
|                   | HLA-DRA              | 0.33 | 6.9e-11 | -0.3  | 0.0011  |
|                   | HLA-DPA1             | 0.25 | 1.1e-06 | -0.27 | 0.0028  |
|                   | BDCA-1(CD1C)         | 0.23 | 1.2e-05 | 0.73  | 0       |
|                   | BDCA-4(NRP1)         | 0.3  | 7.5e-09 | -0.32 | 0.00051 |
|                   | CD11c (ITGAX)        | 0.22 | 1.3e-05 | -0.29 | 0.0014  |
| Th1               | T-bet (TBX21)        | 0.13 | 0.013   | -0.22 | 0.019   |
|                   | STAT4                | 0.16 | 0.0021  | -0.22 | 0.018   |
|                   | STAT1                | 0.22 | 2.2e-05 | -0.3  | 8e-04   |
|                   | IFN- $\gamma$ (IFNG) | 0.22 | 1.4e-05 | -0.32 | 0.00034 |
| T cell exhaustion | TNF- $\alpha$ (TNF)  | 0.17 | 0.0011  | -0.28 | 0.0021  |
|                   | PD-1 (PDCD1)         | 0.28 | 4.7e-08 | 0.65  | 2.2e-15 |
|                   | CTLA4                | 0.21 | 5.4e-05 | -0.26 | 0.0046  |
|                   | LAG3                 | 0.29 | 1.4e-08 | -0.32 | 0.00047 |
|                   | TIM-3 (HAVCR2)       | 0.18 | 0.00069 | -0.26 | 0.0038  |
|                   | GZMB                 | 0.18 | 0.00073 | -0.26 | 0.0038  |

**Supplementary Table 2. Correlation analysis between STAT1 and TNF- $\alpha$ , IFN- $\gamma$ , PD-L1 and CTLA-4 in LIHC and THYM in GEPIA.**

| Gene          | LIHC |         | THYM |         |
|---------------|------|---------|------|---------|
|               | cor  | P       | cor  | P       |
| IFN- $\gamma$ | 0.47 | 0       | 0.39 | 1.3e-05 |
| PD-L1 (CD274) | 0.24 | 2.5e-06 | 0.41 | 3.5e-06 |
| CTLA-4        | 0.44 | 0       | 0.32 | 0.00039 |
