# Supplementary material for: A disparate role of RP11-424C20.2/UHRF1 axis through control of tumor immune escape in liver hepatocellular carcinoma and thymoma
Source: PubMed Central journal article supplement (PMC6738438; doi:10.18632/aging.102197), 2019-08-23
Supplement: aging-11-102197-s002.pdf [file aging-11-102197-s002.pdf]

SUPPLEMENTARY FIGURES

Range 1: 1197 to 2619 [GenBank](#) [Graphics](#) ▼ Next Match ▲ Previous Match

| Score           | Expect                                                                                      | Identities     | Gaps       | Strand    |
|-----------------|---------------------------------------------------------------------------------------------|----------------|------------|-----------|
| 2584 bits(1399) | 0.0                                                                                         | 1415/1423(99%) | 0/1423(0%) | Plus/Plus |
| Query 1         | TGCGGGGGCCGGCAGGACCCCGACAAGCAGCTCATGTGCGATGAGTGCACATGGCCTTCCACATCTACTGCCTGGACCCGCCCTCAGC    | 90             |            |           |
| Sbjct 1197      | TGCGGGGGCCGGCAGGACCCCGACAAGCAGCTCATGTGCGATGAGTGCACATGGCCTTCCACATCTACTGCCTGGACCCGCCCTCAGC    | 1286           |            |           |
| Query 91        | AGTGTTCACAGCAGGACGAGTGGTACTGCCTGAGTGCAGGAATGATGCCAGCAGGTTGGTACTGGCGGGAGAGCGCTGAGAGAGAC      | 180            |            |           |
| Sbjct 1287      | AGTGTTCACAGCAGGACGAGTGGTACTGCCTGAGTGCAGGAATGATGCCAGCAGGTTGGTACTGGCGGGAGAGCGCTGAGAGAGAC      | 1376           |            |           |
| Query 181       | AAGAAGAAGGCAGAGATGGCCTCGGCCACATCGTCTCACAGCGGGACTGGGCAAGGGCATGGCCTGTGTGGCCGCACCAAGGAATGT     | 270            |            |           |
| Sbjct 1377      | AAGAAGAAGGCAGAGATGGCCTCGGCCACATCGTCTCACAGCGGGACTGGGCAAGGGCATGGCCTGTGTGGCCGCACCAAGGAATGT     | 1466           |            |           |
| Query 271       | ACCATCATCCCGTCCCAACCACTACGGACCCATCCCGGGGATCCCGTGGGCACCATGTGGCGGTTCCGAGTCCAGGTGAGCGAGTCCGGGT | 360            |            |           |
| Sbjct 1467      | ACCATCATCCCGTCCCAACCACTACGGACCCATCCCGGGGATCCCGTGGGCACCATGTGGCGGTTCCGAGTCCAGGTGAGCGAGTCCGGGT | 1556           |            |           |
| Query 361       | GTCATCGGGCCACGTTGGCTGGCATCCATGGCCGGAGCAACGAGCGGACTACTCCCTAGTCTGGCGGGGGCTACGAGGATGAGCTG      | 450            |            |           |
| Sbjct 1557      | GTCATCGGGCCACGTTGGCTGGCATCCATGGCCGGAGCAACGAGCGGACTACTCCCTAGTCTGGCGGGGGCTACGAGGATGAGCTG      | 1646           |            |           |
| Query 451       | GACCATGGGAATTTTTTTCACATACACGGGTAGTGGTGGTGCAGAGCTTTCCGGCAACAAGAGGACCCGGGAACAGTCTTGTGATCAGAAA | 540            |            |           |
| Sbjct 1647      | GACCATGGGAATTTTTTTCACATACACGGGTAGTGGTGGTGCAGAGCTTTCCGGCAACAAGAGGACCCGGGAACAGTCTTGTGATCAGAAA | 1736           |            |           |
| Query 541       | CTCACCAACACCAACAGGGCGCTGGCTCTCAACTGCTTTGCTCCCATCAATGACCAAGAAGGGCCGAGGCCAAGGACTGGCGTCCGGG    | 630            |            |           |
| Sbjct 1737      | CTCACCAACACCAACAGGGCGCTGGCTCTCAACTGCTTTGCTCCCATCAATGACCAAGAAGGGCCGAGGCCAAGGACTGGCGTCCGGG    | 1826           |            |           |
| Query 631       | AAGCCGGTCAGGGTGGTGCAGCAATGTCAAGGGTGGCAAGAATAGCAAGTACGCCCCGCTGAGGGCAACCGCTACGATGGCATCTACAAG  | 720            |            |           |
| Sbjct 1827      | AAGCCGGTCAGGGTGGTGCAGCAATGTCAAGGGTGGCAAGAATAGCAAGTACGCCCCGCTGAGGGCAACCGCTACGATGGCATCTACAAG  | 1916           |            |           |
| Query 721       | GTTGTGAAATACTGGCCCGAGAAGGGGAAGTCGGGTTTCTCGTGTGGCGCTACCTTCTGCGGAGGGACGATGATGAGCCCGGCCCTTGG   | 810            |            |           |
| Sbjct 1917      | GTTGTGAAATACTGGCCCGAGAAGGGGAAGTCGGGTTTCTCGTGTGGCGCTACCTTCTGCGGAGGGACGATGATGAGCCCGGCCCTTGG   | 2006           |            |           |
| Query 811       | ACGAAGGAGGGGAAGGACCGGATCAAGAAGCTGGGGTGCACATGCAGTATCCAGAAGGCTACCTGGAAGCCCTGGCCAACGgagagcga   | 900            |            |           |
| Sbjct 2007      | ACGAAGGAGGGGAAGGACCGGATCAAGAAGCTGGGGTGCACATGCAGTATCCAGAAGGCTACCTGGAAGCCCTGGCCAACCGGAGAGCGGA | 2096           |            |           |
| Query 901       | gagaagagaaacagcaagagggaggaggaggagcagcaggaggggggCTTCGCGTCCCCAGGACGGGCAAGGGCAAGTGGAAAGCGGAAG  | 990            |            |           |
| Sbjct 2097      | GAGAAGGAAACAGCAAGAGGGAGGAGGAGGAGCAGCAGGAGGGGGGCTTCGCGTCCCCAGGACGGGCAAGGGCAAGTGGAAAGCGGAAG   | 2186           |            |           |
| Query 991       | TCGGCAGGAGGTGGCCCGAGCAGGGCCGGTCCCCCGCCGGACATCCAAGAAAACCAAGGTGGAGCCCTACAGTCTCACGGCCAGCAG     | 1080           |            |           |
| Sbjct 2187      | TCGGCAGGAGGTGGCCCGAGCAGGGCCGGTCCCCCGCCGGACATCCAAGAAAACCAAGGTGGAGCCCTACAGTCTCACGGCCAGCAG     | 2276           |            |           |
| Query 1081      | AGCAGCCTCATCAGAGAGGACAAGAGCAACGCCAAGCTGTGGAATGAGGTCTTGGCGTCACTCAAGGACCGGCCGGCAGCGCCAGCCCG   | 1170           |            |           |
| Sbjct 2277      | AGCAGCCTCATCAGAGAGGACAAGAGCAACGCCAAGCTGTGGAATGAGGTCTTGGCGTCACTCAAGGACCGGCCGGCAGCGCCAGCCCG   | 2366           |            |           |
| Query 1171      | TTCAGTTGTTCTGAGTAAAGTGGAGGAGACGTTCCAGTGTATCTGCTGTCAGGAGCTGGTGTTCGGGCCATCACGACCGTGTGCCAG     | 1260           |            |           |
| Sbjct 2367      | TTCAGTTGTTCTGAGTAAAGTGGAGGAGACGTTCCAGTGTATCTGCTGTCAGGAGCTGGTGTTCGGGCCATCACGACCGTGTGCCAG     | 2456           |            |           |
| Query 1261      | CACAACGTGTGCAAGGACTGCCTGGACAGATCCTTTCGGGCACAGGTGTTTTCAGTGCCTGCCCTGCCCTACGACCTGGGCCGAGCTAT   | 1350           |            |           |
| Sbjct 2457      | CACAACGTGTGCAAGGACTGCCTGGACAGATCCTTTCGGGCACAGGTGTTTTCAGTGCCTGCCCTGCCCTACGACCTGGGCCGAGCTAT   | 2546           |            |           |
| Query 1351      | GCCATGCAGGTGAACCAAGCCTCTGCAGACCGTCTCAACCAGCTCTTCCCGGGTACGGCAATGGCCGGTAT                     | 1423           |            |           |
| Sbjct 2547      | GCCATGCAGGTGAACCAAGCCTCTGCAGACCGTCTCAACCAGCTCTTCCCGGGTACGGCAATGGCCGGTAT                     | 2619           |            |           |

Supplementary Figure 1. Sequence similarity between RP11-424C20.2 and its parental gene UHRF1 (NM\_001048201.2).

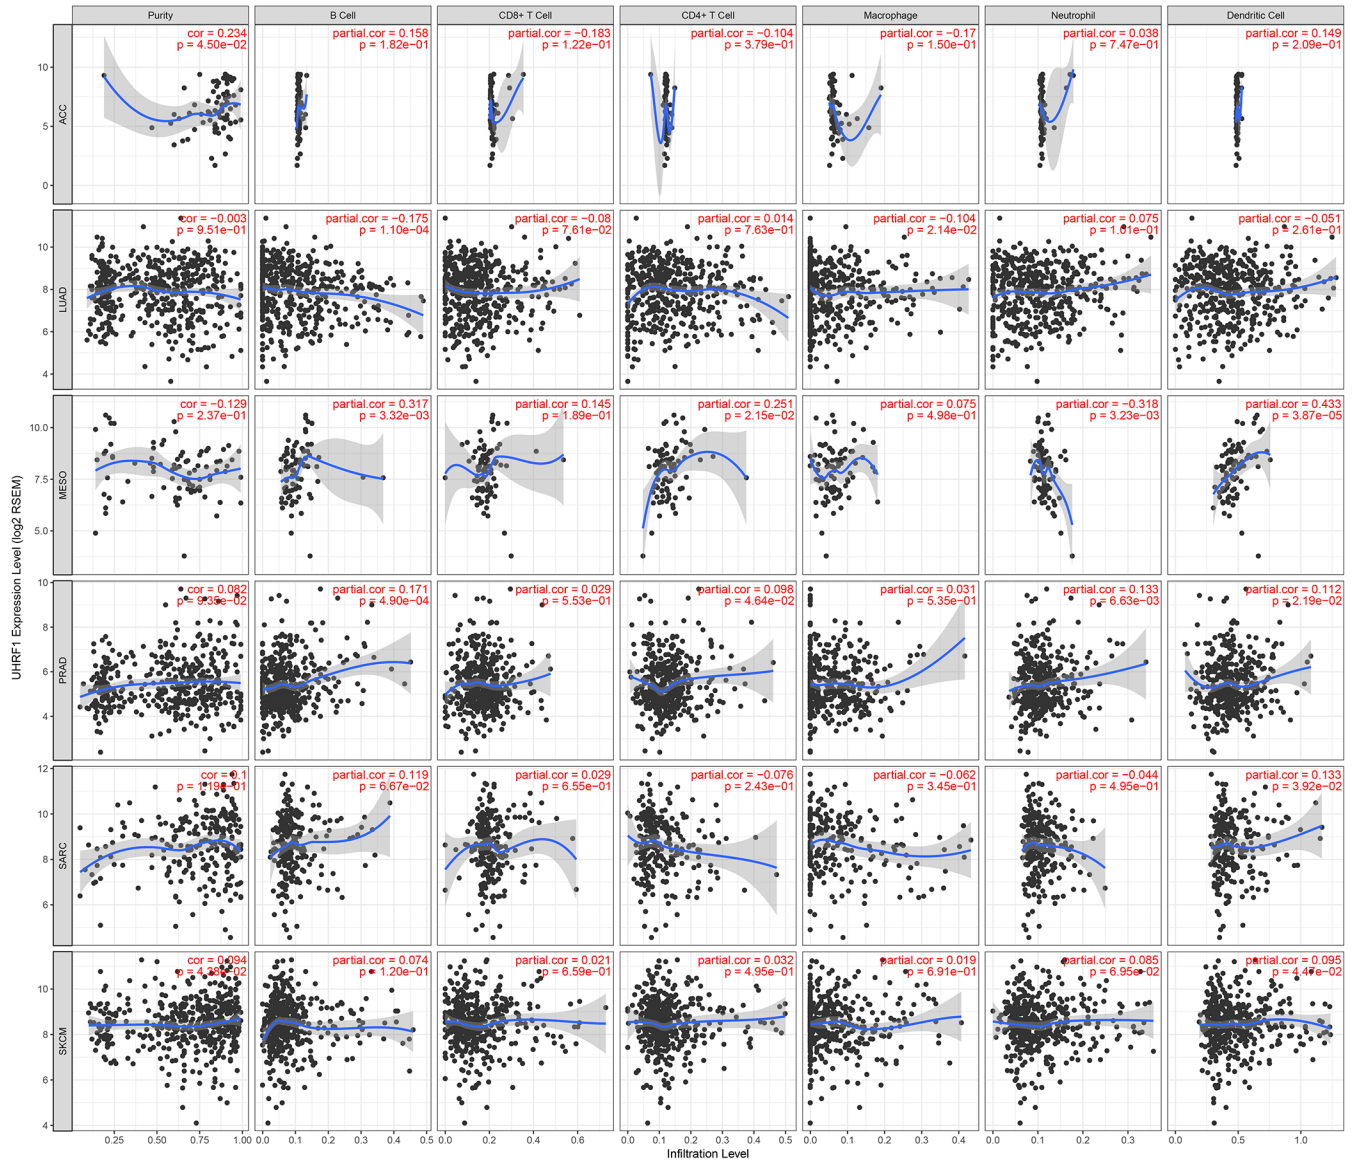

Supplementary Figure 2. Correlation of UHRF1 expression with immune infiltration in ACC, LUAD, MESO, PRAD, SARC and SKCM analyzed using the “Gene” module in TIMER.

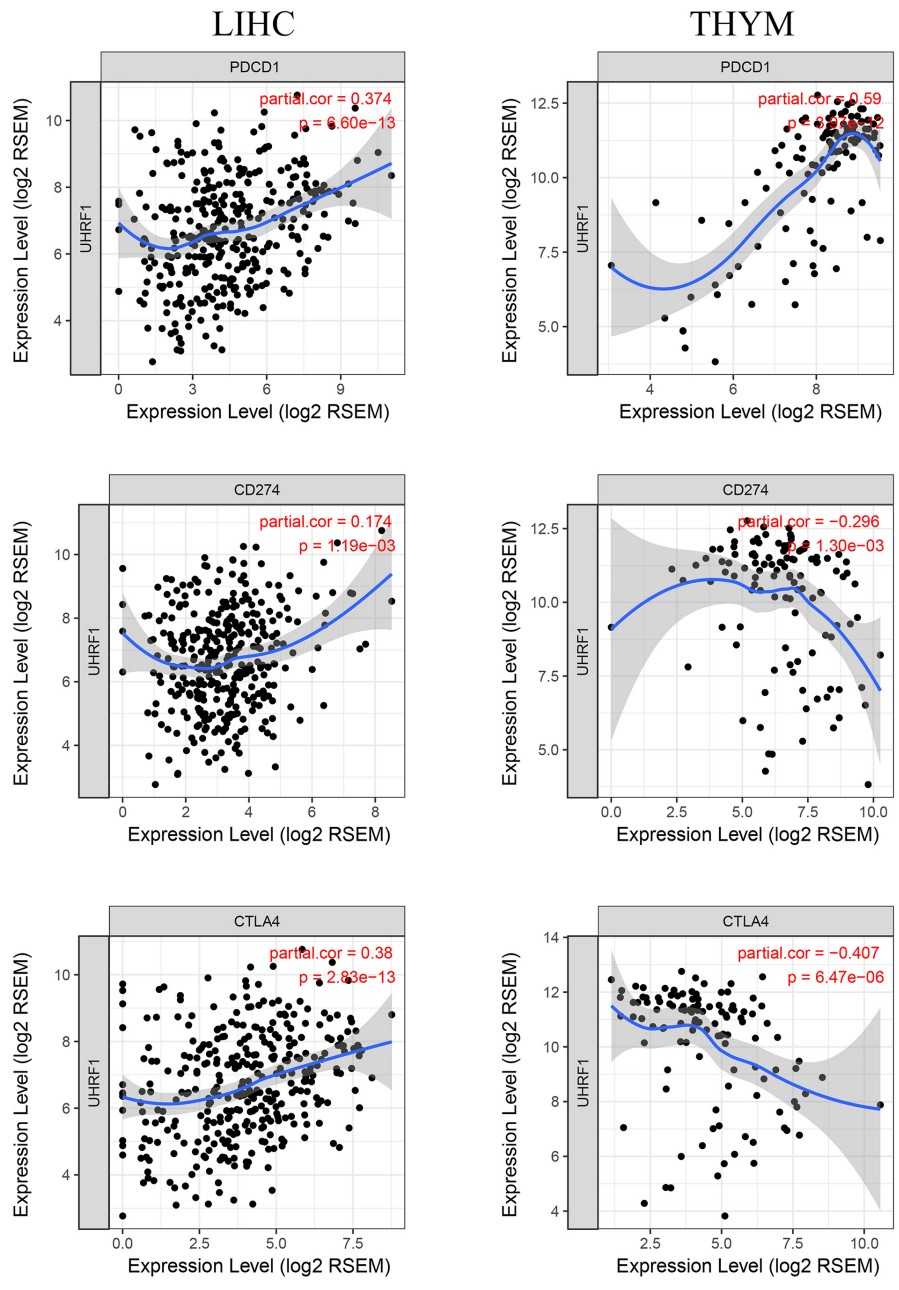

Supplementary Figure 3. Correlation analysis between UHRF1 expression and PD-1, PD-L1 and CTLA-4.
